# Supplementary material for: Raspberry Ketone [4-(4-Hydroxyphenyl)-2-Butanone] Differentially Effects Meal Patterns and Cardiovascular Parameters in Mice
Source: PubMed Central journal article supplement (PMC7353175; doi:10.3390/nu12061754), 2020-06-11
Supplement: nutrients-12-01754-s001.pdf [file nutrients-12-01754-s001.pdf]

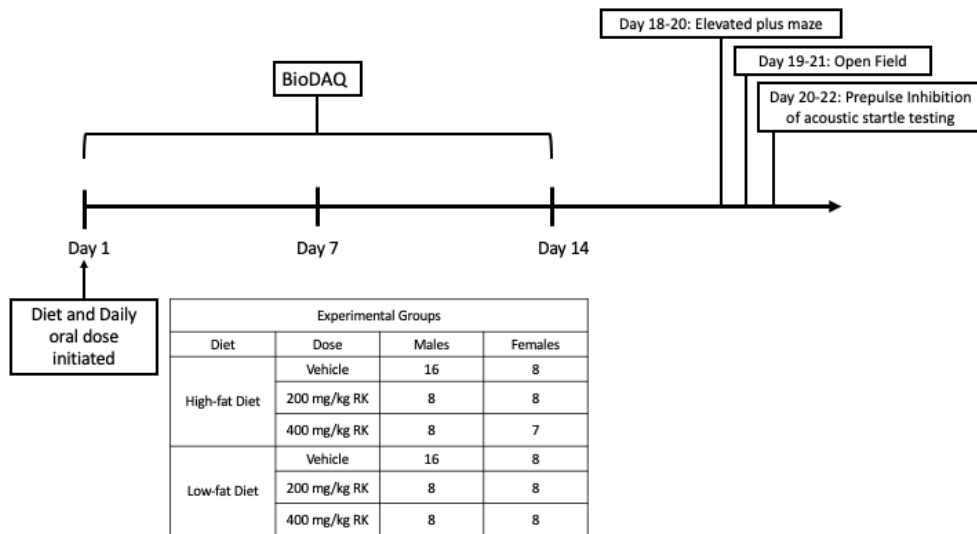

**Figure S1.** Experimental design for measurement of meal patterns and behavioral outcomes during exposure to respective diet and dose treatments.

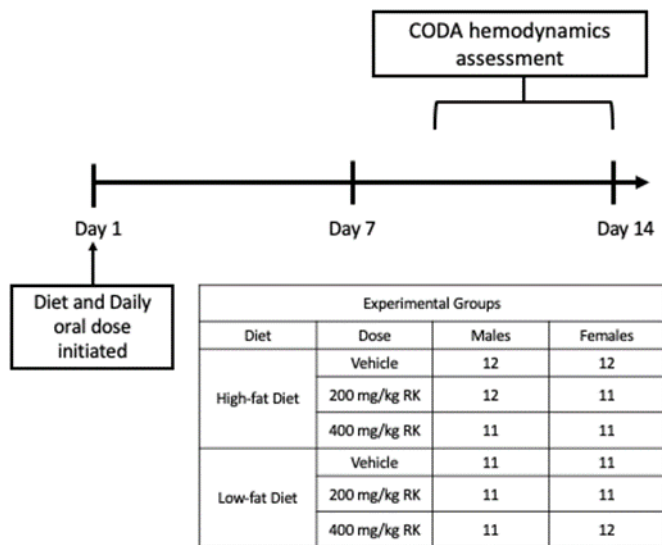

**Figure S2.** Experimental design for measurement of hemodynamic parameters after 14-day exposure to respective diet and dose treatments.

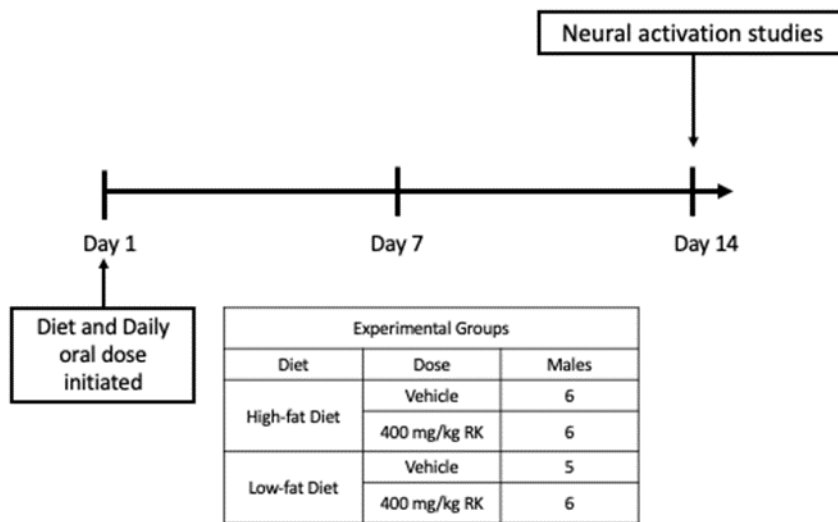

**Figure S3.** Experimental design to study activation of caudal hindbrain in response to respective diet and dose treatments.
